# Supplementary material for: Ferrocene catalysed heteroarylation of BODIPy and reaction mechanism studies by EPR and DFT methods
Source: Royal Society of Chemistry journal article supplement (doi:10.1039/c6ra03705d), 2016-01-01
Supplement: c6ra03705d1.pdf [file c6ra03705d1.pdf]

## Supplementary Information

# Ferrocene catalysed heteroarylation of BODIPy and reaction mechanism studies by EPR and DFT methods

Swati Dixit,<sup>a</sup> Mahendra Patil\*<sup>a</sup> and Neeraj Agarwal\*<sup>a</sup>

UM-DAE, Centre for Excellence in Basic Sciences, Health Center Building,

Kalina Campus, Santacruz (E), Mumbai, 400098, India

E-mail: mahendra.patil@cbs.ac.in and na@cbs.ac.in

---

### Contents:

**Figure SI 1:** <sup>1</sup>H NMR (above) and <sup>13</sup>C NMR (below) spectra of **1** in CDCl<sub>3</sub>

**Figure SI 2:** <sup>1</sup>H NMR (above) and <sup>13</sup>C NMR (below) spectra of **3** in CDCl<sub>3</sub>

**Figure SI 3:** <sup>1</sup>H NMR (above) and <sup>13</sup>C NMR (below) spectra of **4** in CDCl<sub>3</sub>

**Figure SI 4:** <sup>1</sup>H NMR (above) and <sup>13</sup>C NMR (below) spectra of **5** in CDCl<sub>3</sub>

**Figure SI 5:** <sup>1</sup>H NMR (above) and <sup>13</sup>C NMR (below) spectra of **6** in CDCl<sub>3</sub>

**Figure SI 6:** <sup>1</sup>H NMR (above) and <sup>13</sup>C NMR (below) spectra of **7** in CDCl<sub>3</sub>

**Figure SI 7:** <sup>1</sup>H NMR (above) and <sup>13</sup>C NMR (below) spectra of **8** in CDCl<sub>3</sub>

**Figure SI 8:** COSY of compound **6** in CDCl<sub>3</sub>

**Figures SI 9-16:** MALDI-TOF spectra of compounds **1-8**

**Figure SI 17:** FT-IR spectrum of compound **3**

**Figure SI 18:** FT-IR spectrum of compound **4**

**Figure SI 19:** FT-IR spectrum of compound **5**

**Figure SI 20:** FT-IR spectrum of compound **6**

Density Functional Theory (DFT) calculations data

# NMR spectra:

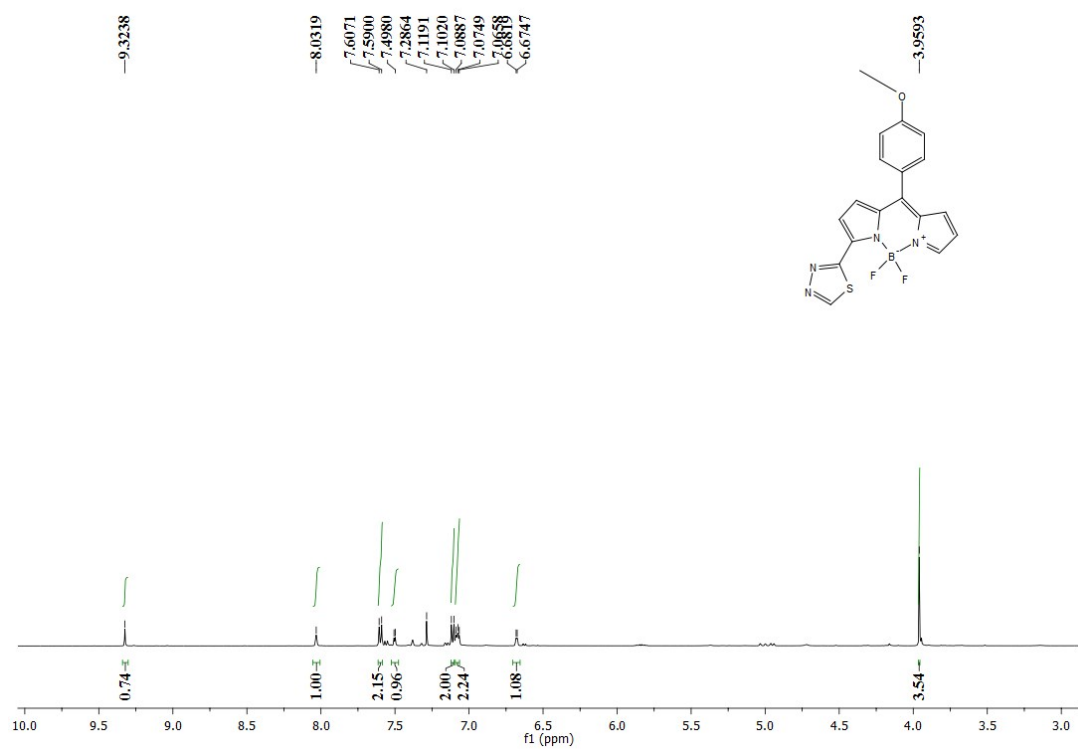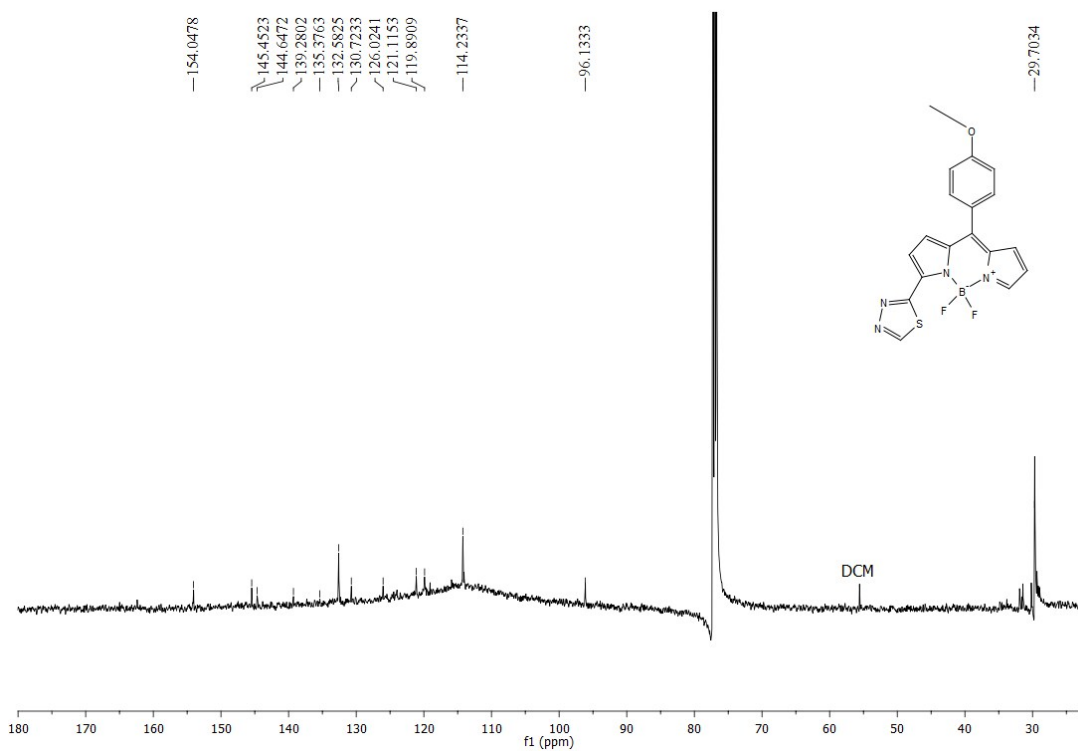

Figure SI 1: <sup>1</sup>H NMR (above) and <sup>13</sup>C NMR (below) spectra of **1** in CDCl<sub>3</sub>

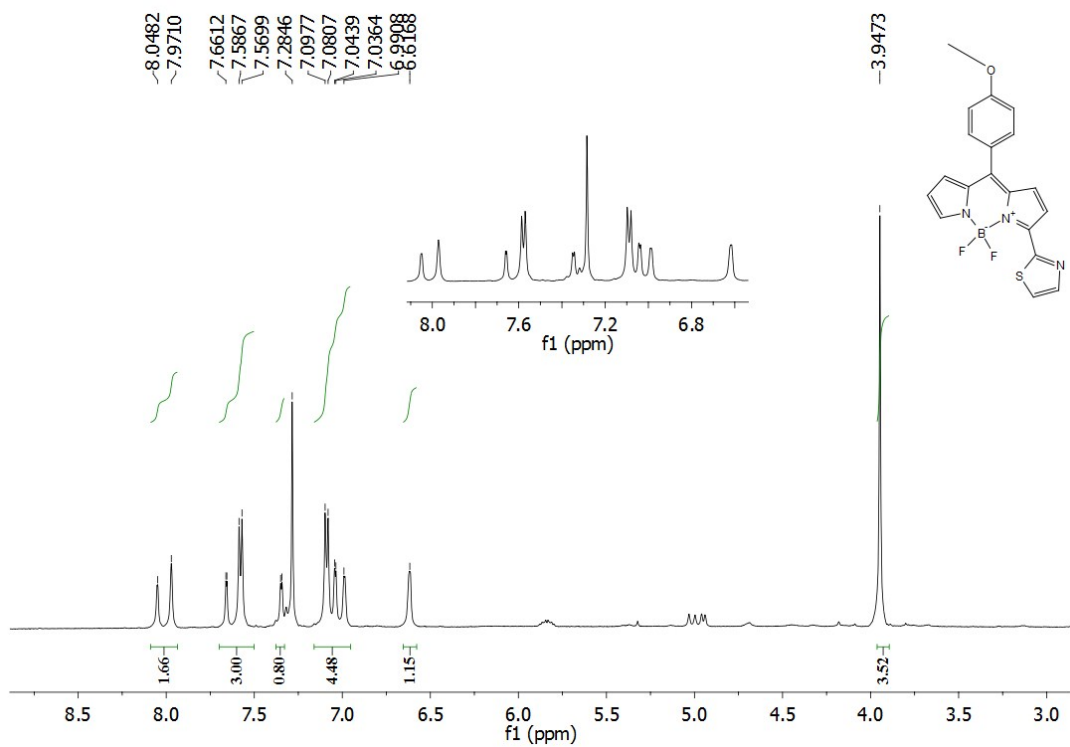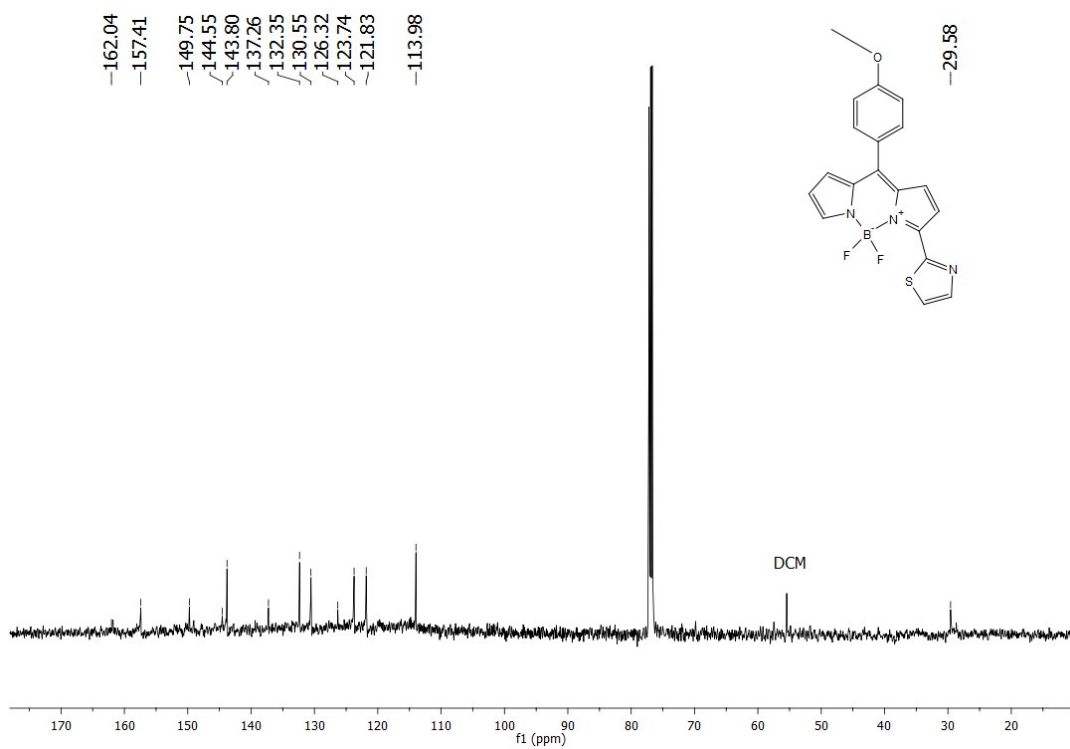

**Figure SI 2:** <sup>1</sup>H NMR (above) and <sup>13</sup>C NMR (below) spectra of **3** in CDCl<sub>3</sub>

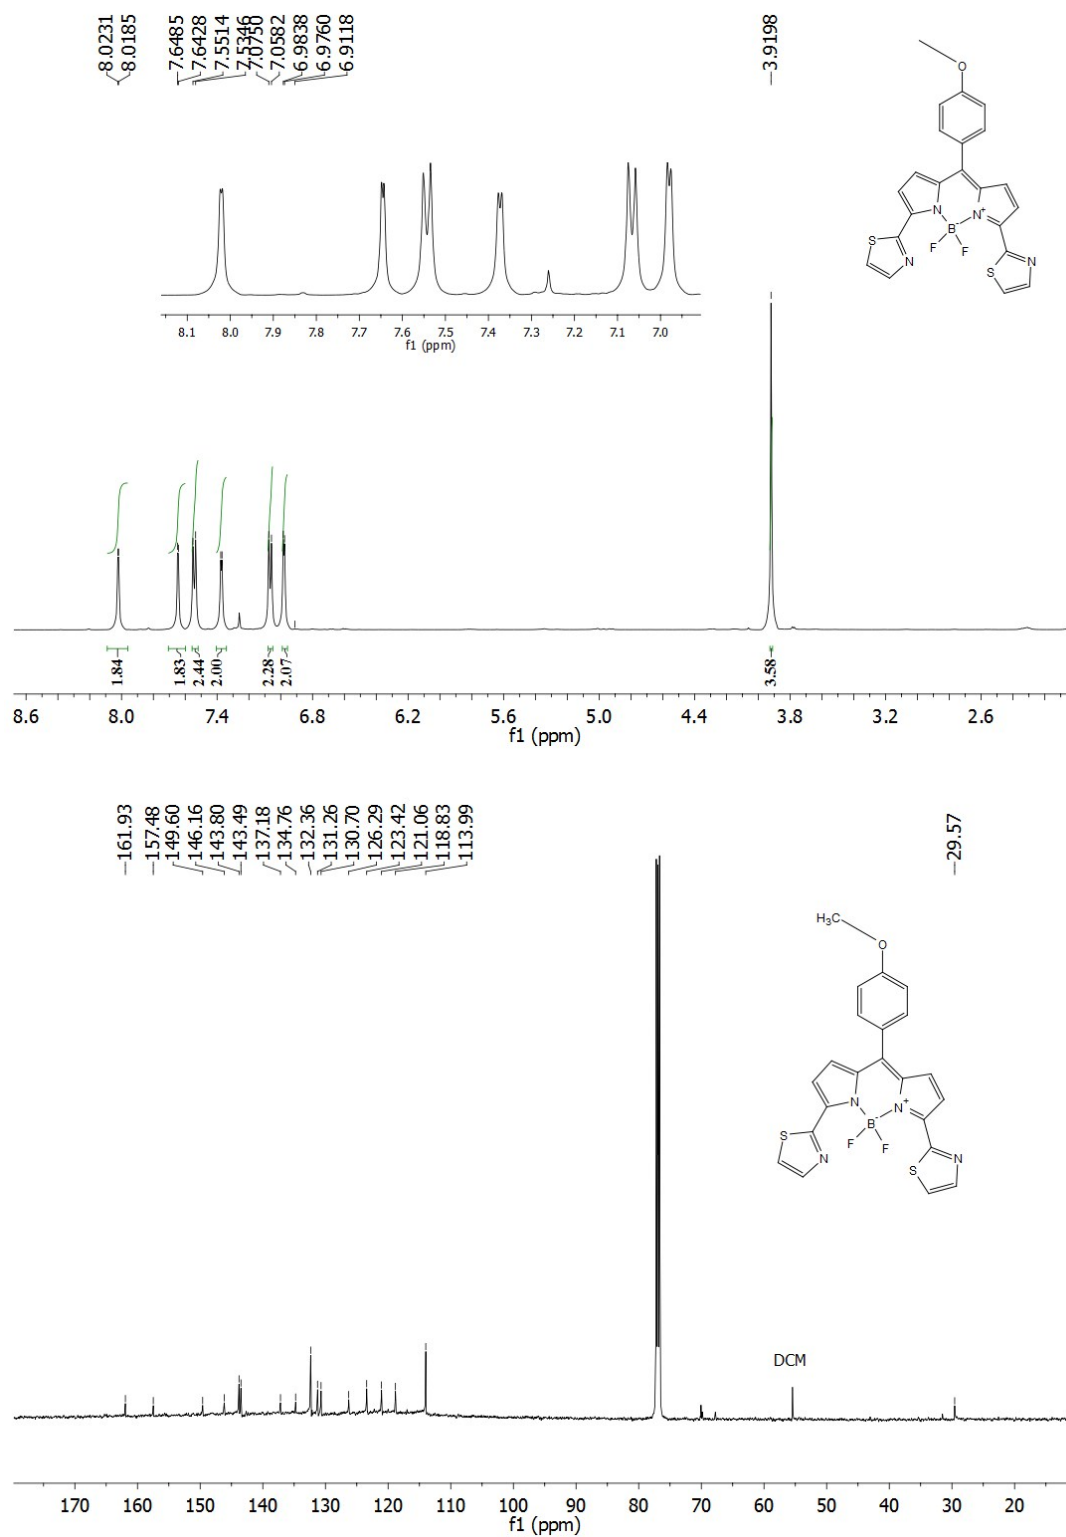

**Figure SI 3:** <sup>1</sup>H NMR (above) and <sup>13</sup>C NMR (below) spectra of **4** in CDCl<sub>3</sub>

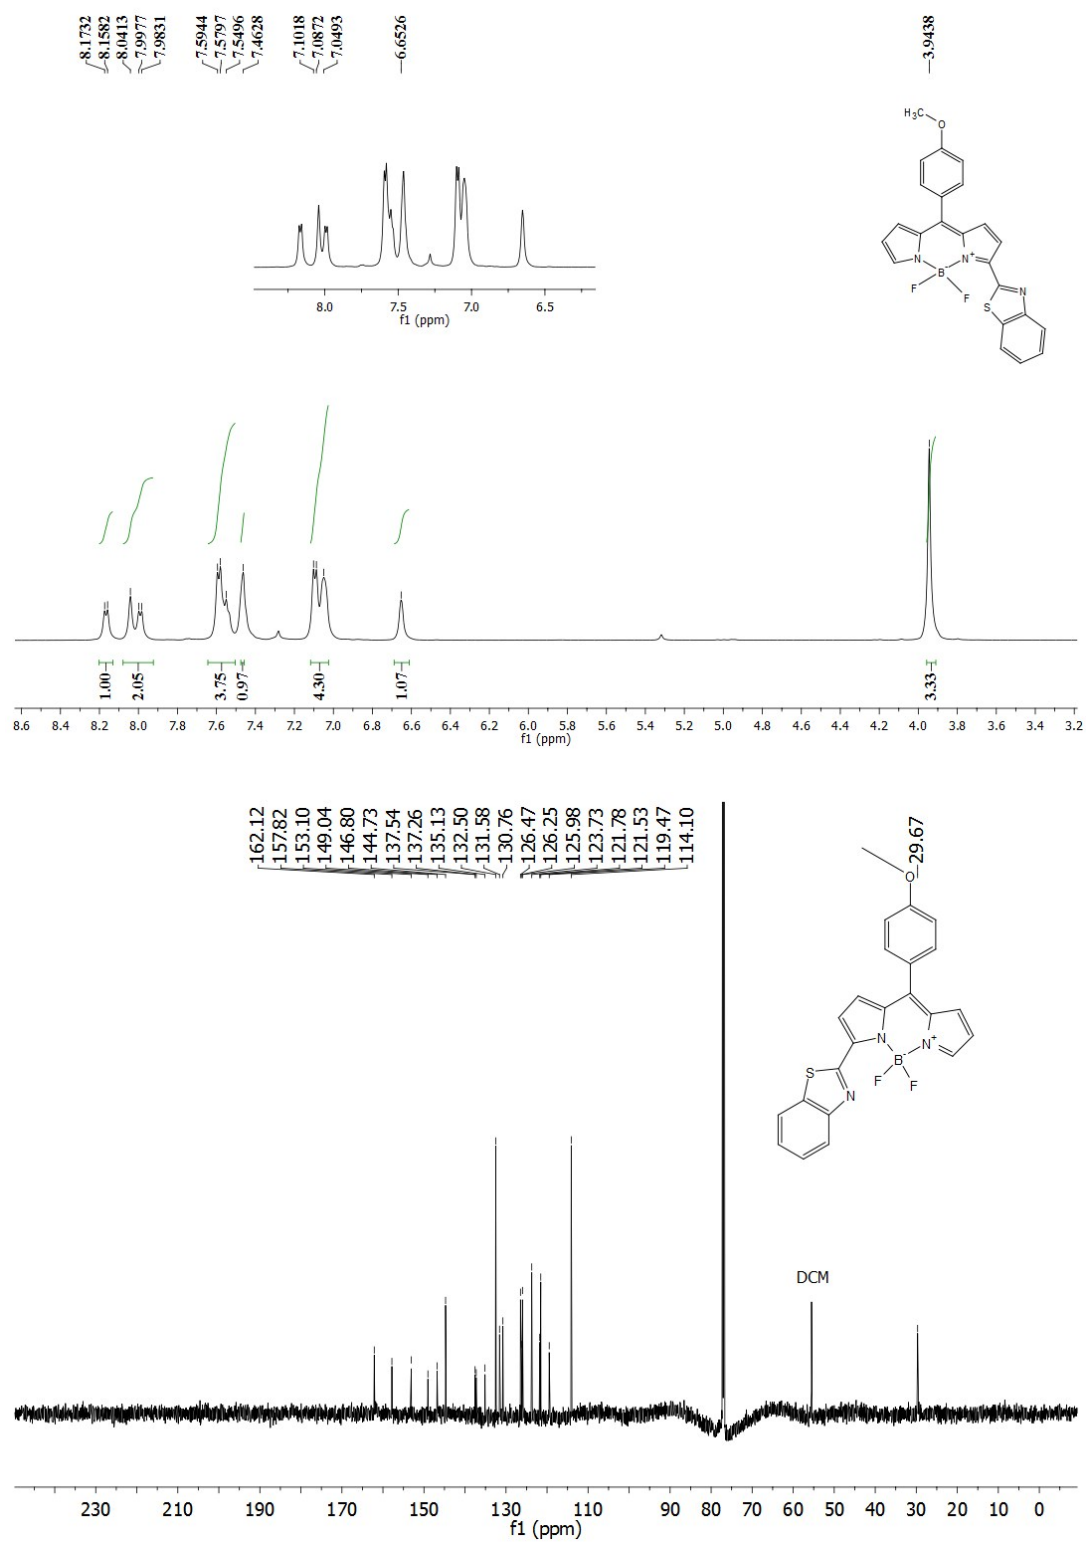

**Figure SI 4:** <sup>1</sup>H NMR (above) and <sup>13</sup>C NMR (below) spectra of **5** in CDCl<sub>3</sub>

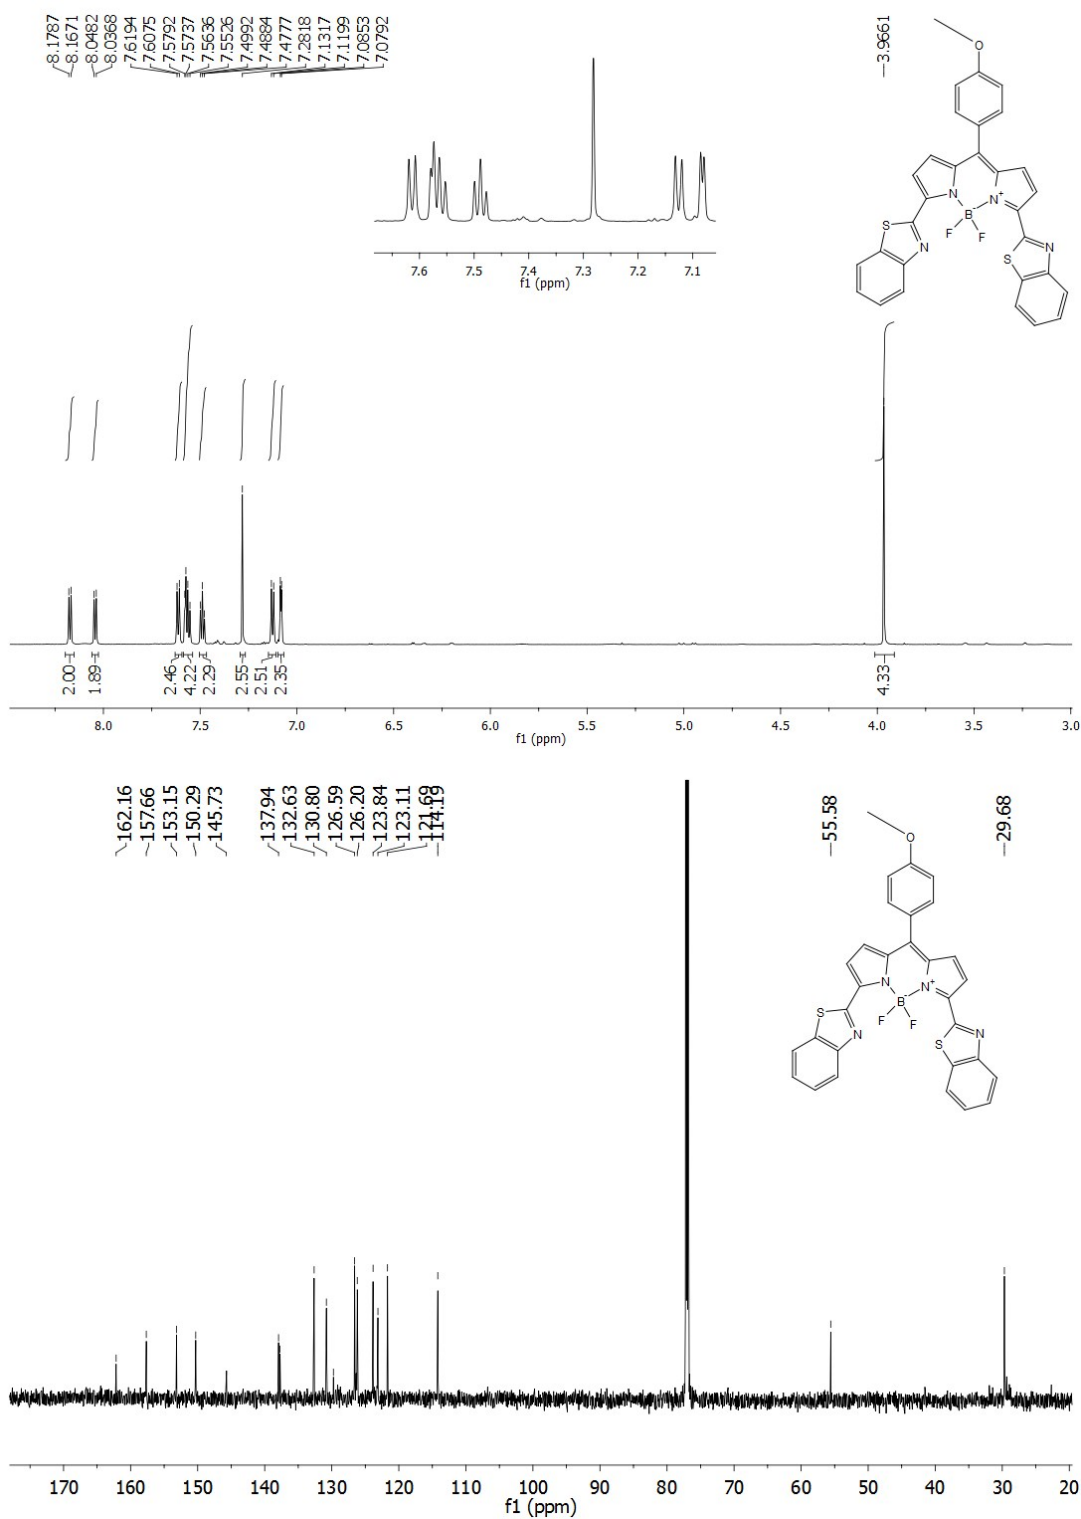

**Figure SI 5:** <sup>1</sup>H NMR (above) and <sup>13</sup>C NMR (below) spectra of **6** in CDCl<sub>3</sub>

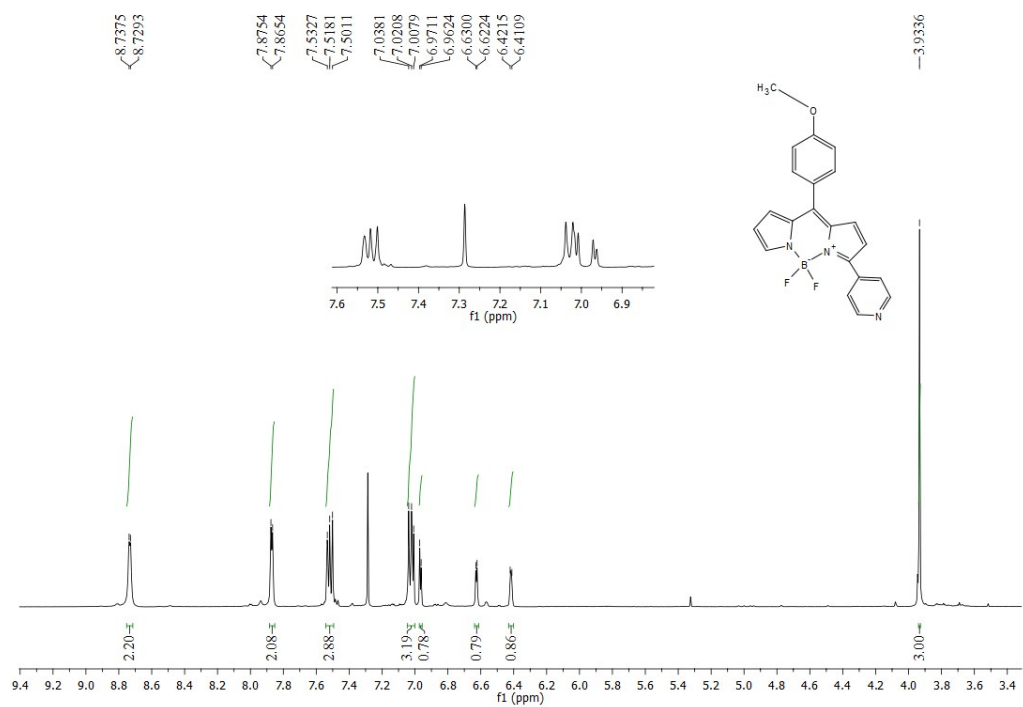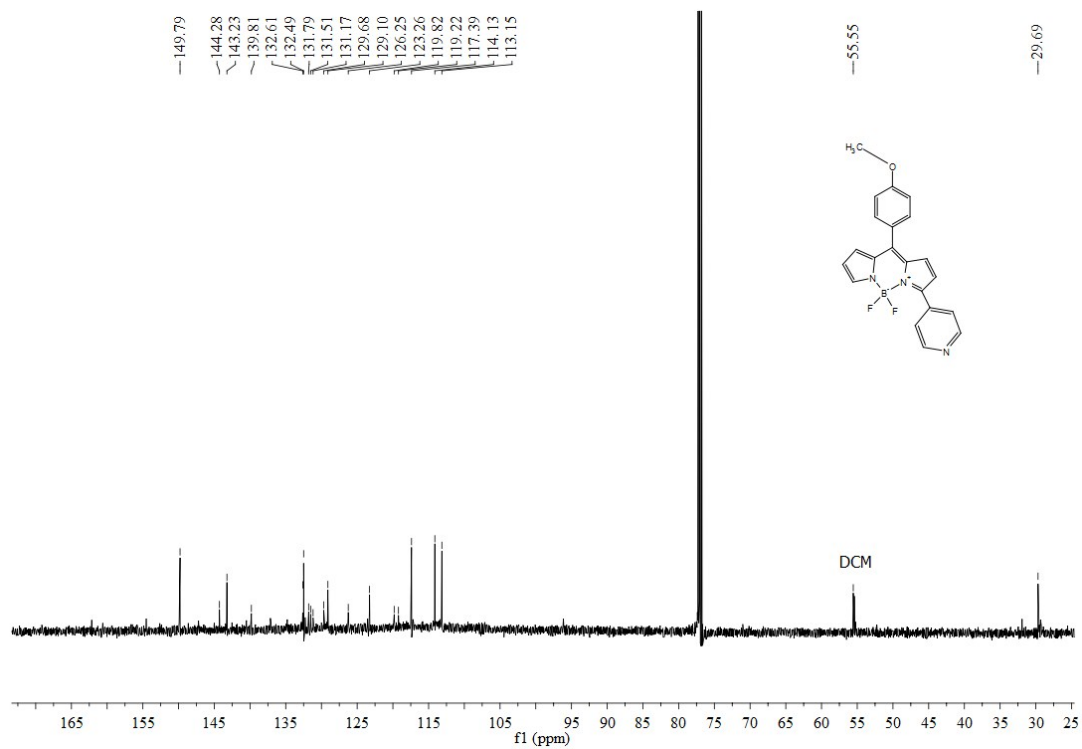

**Figure SI 6:** <sup>1</sup>H NMR (above) and <sup>13</sup>C NMR (below) spectra of **7** in CDCl<sub>3</sub>

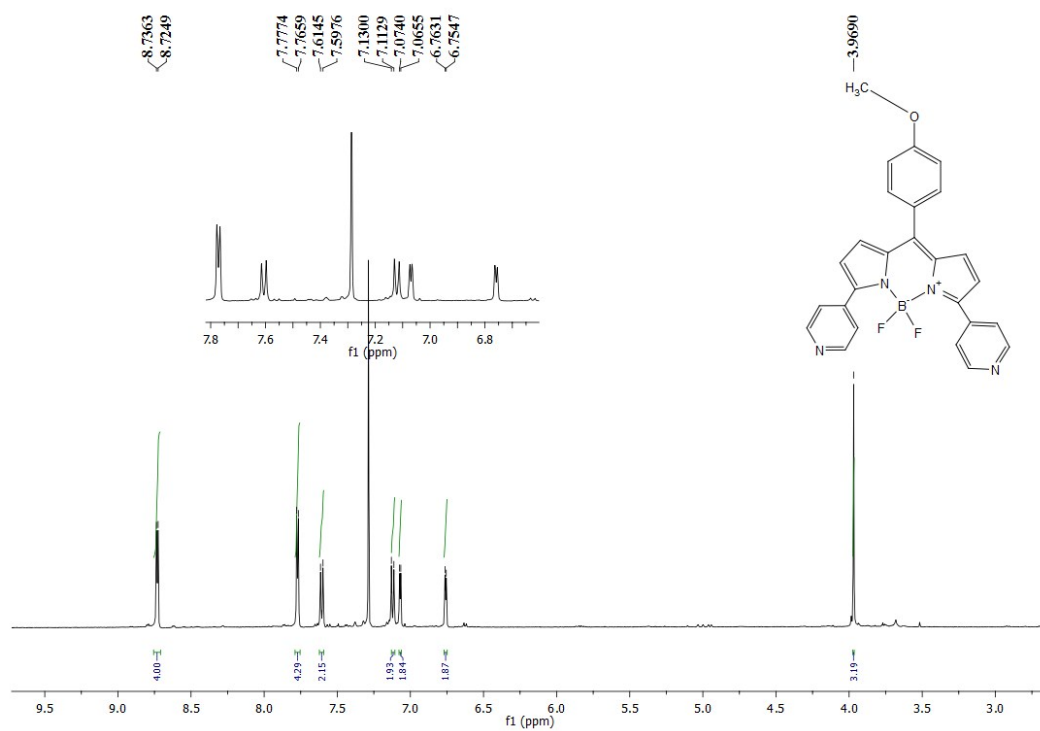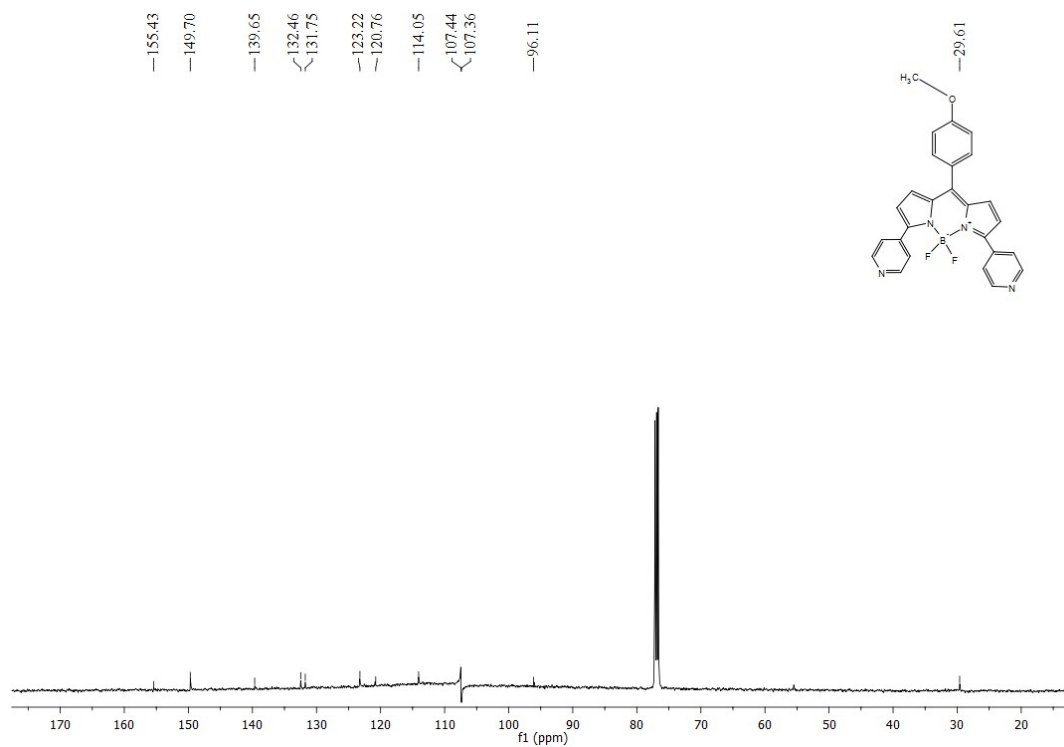

**Figure SI 7:** <sup>1</sup>H NMR (above) and <sup>13</sup>C NMR (below) spectra of **8** in CDCl<sub>3</sub>



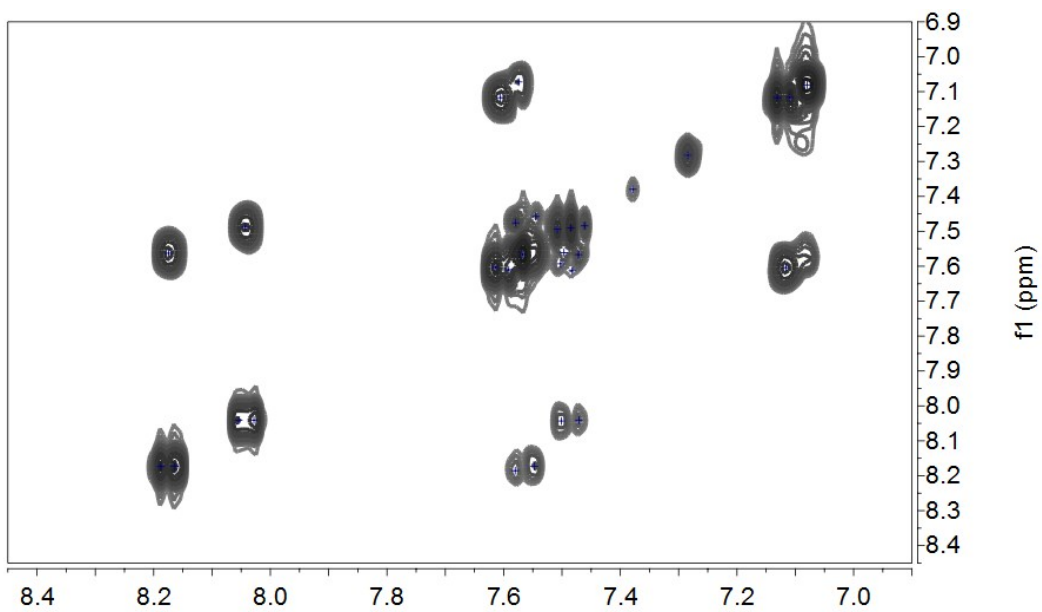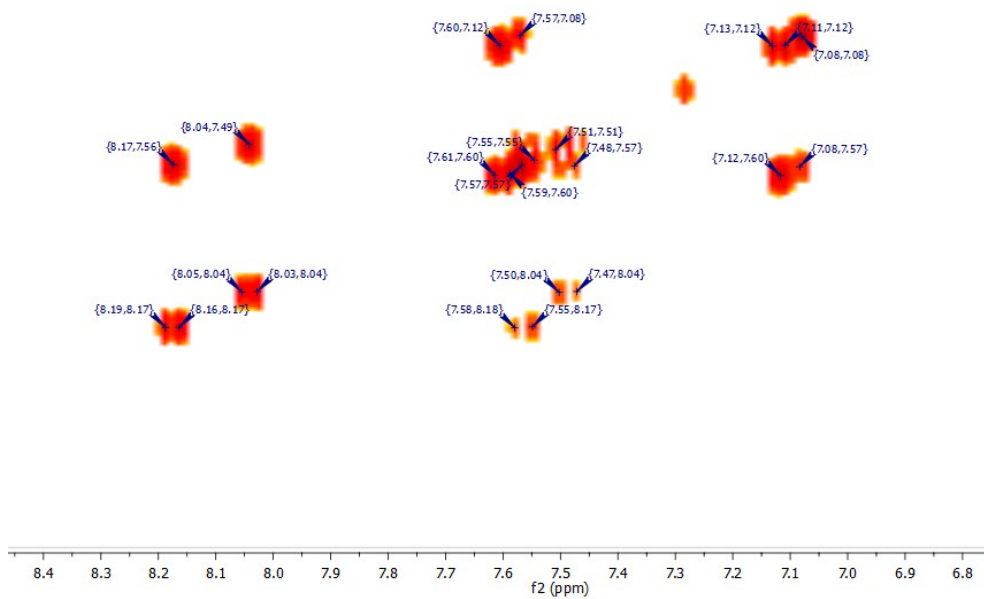

**Figure SI 8:** COSY of compound 6 in CDCl<sub>3</sub>

## Mass spectra:

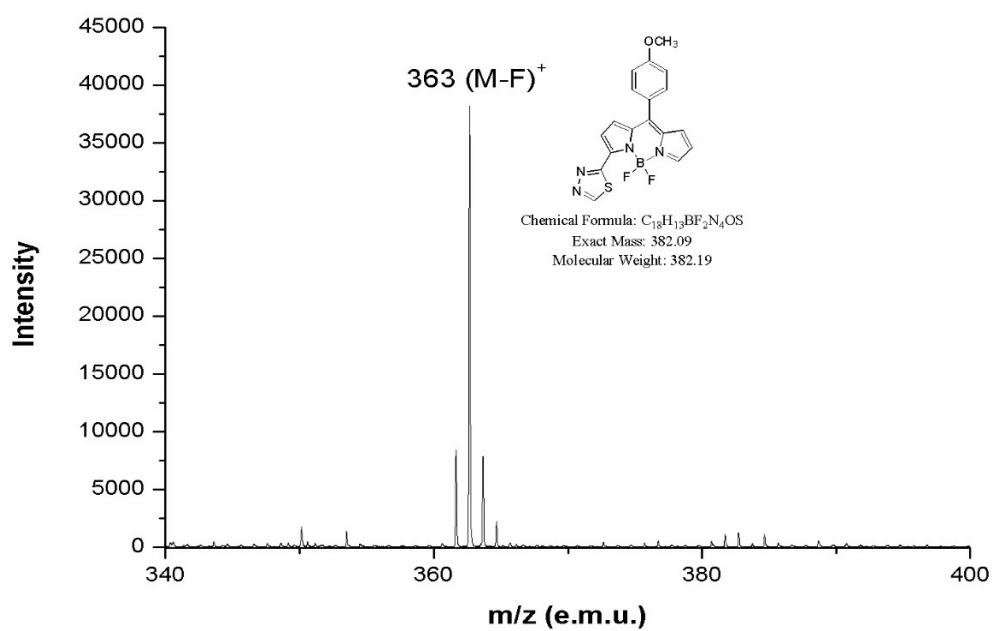

Figure SI 9: MALDI-TOF spectrum of compound 1

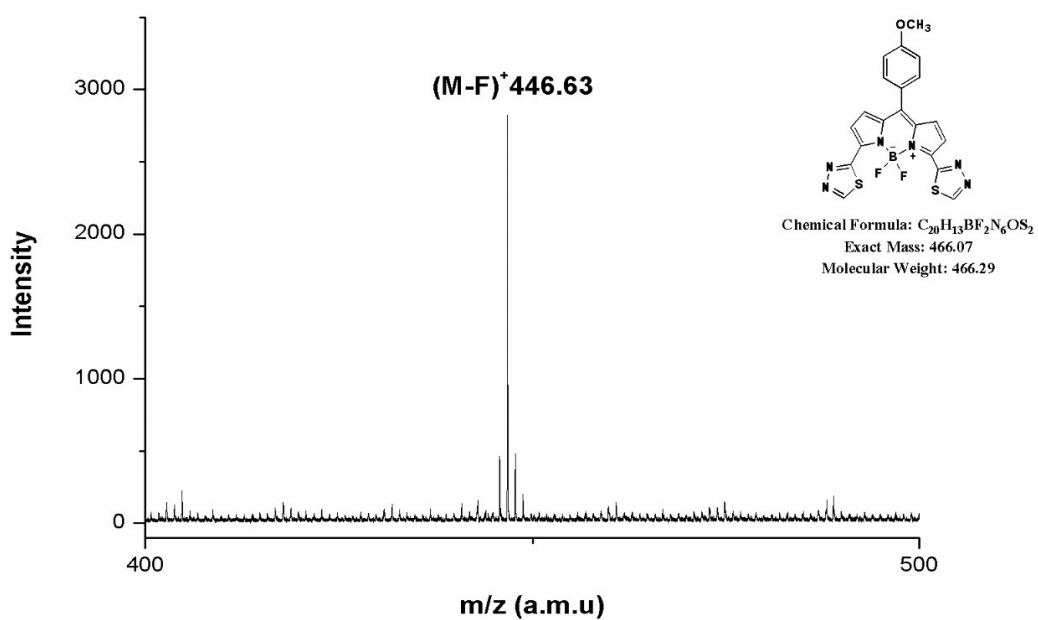

Figure SI 10: MALDI-TOF spectrum of compound 2

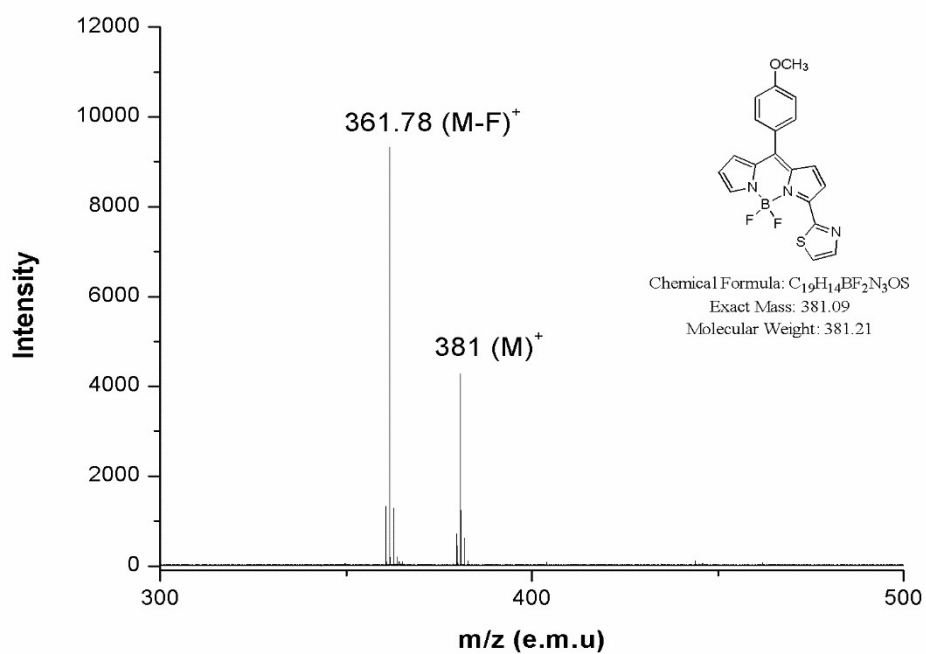

Figure SI 11: MALDI-TOF spectrum of compound 3

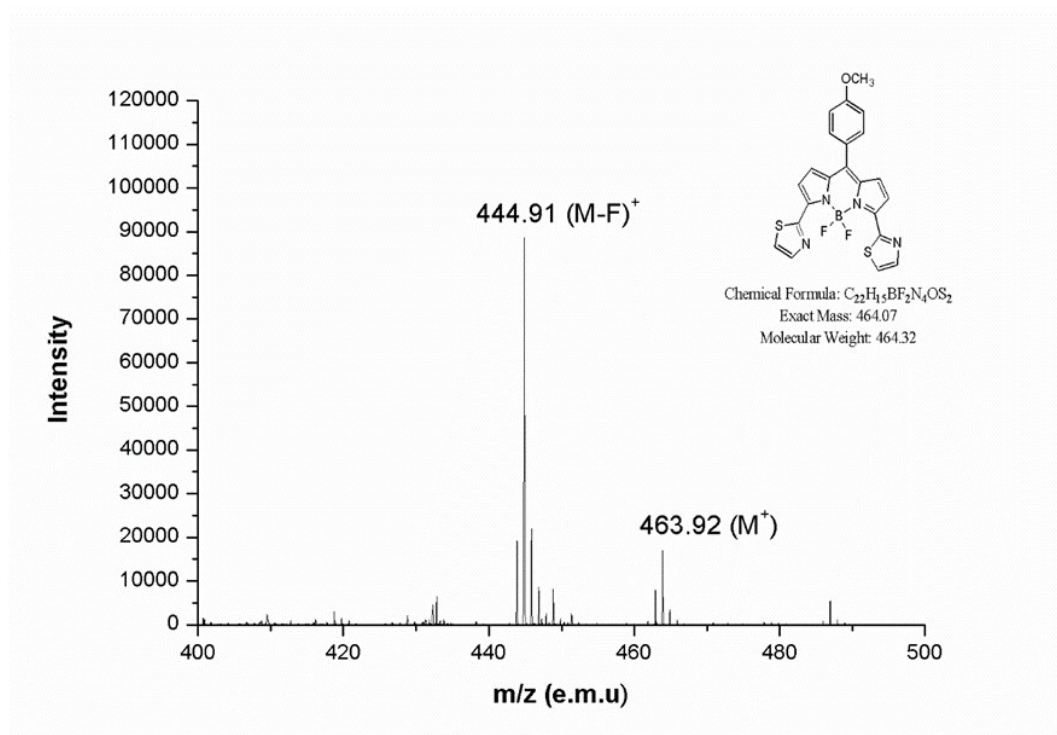

Figure SI 12: MALDI-TOF spectrum of compound 4

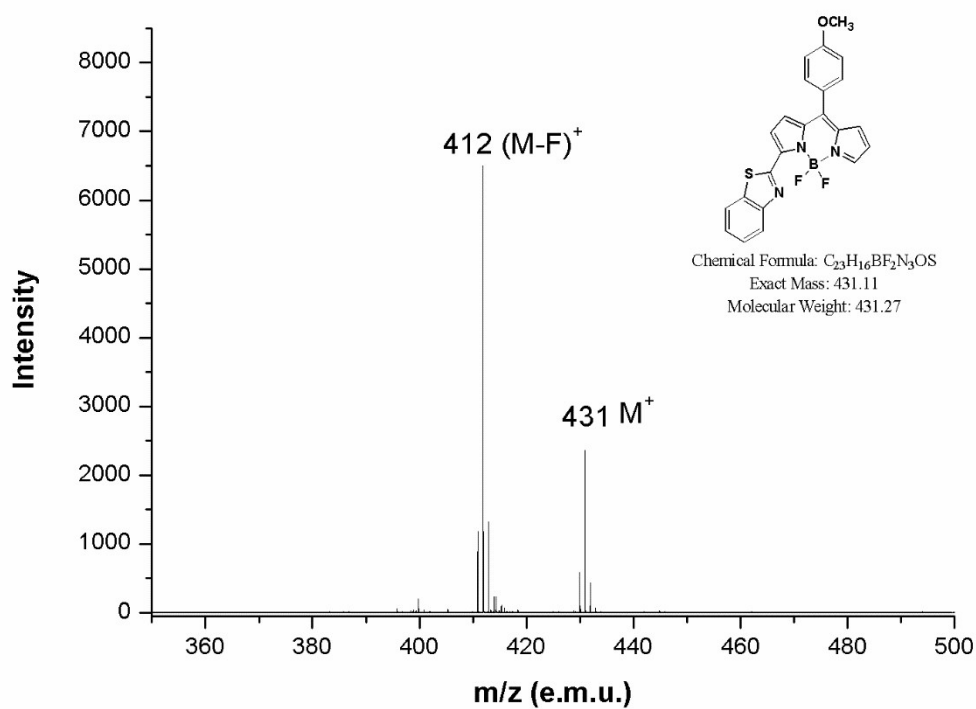

Figure SI 13: MALDI-TOF spectrum of compound 5

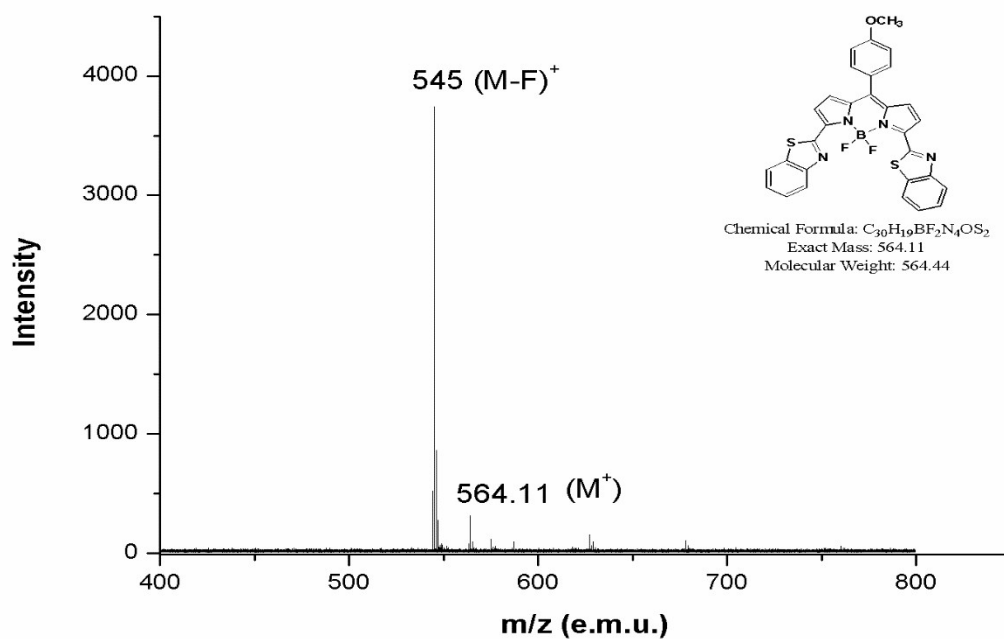

Figure SI 14: MALDI-TOF spectrum of compound 6

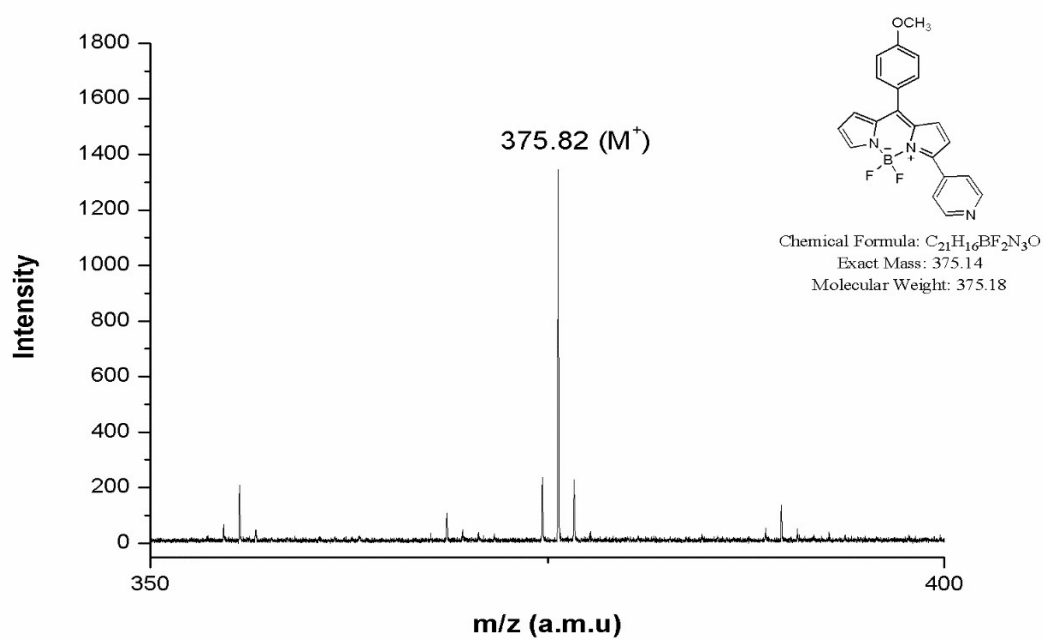

Figure SI 15: MALDI-TOF spectrum of compound 7

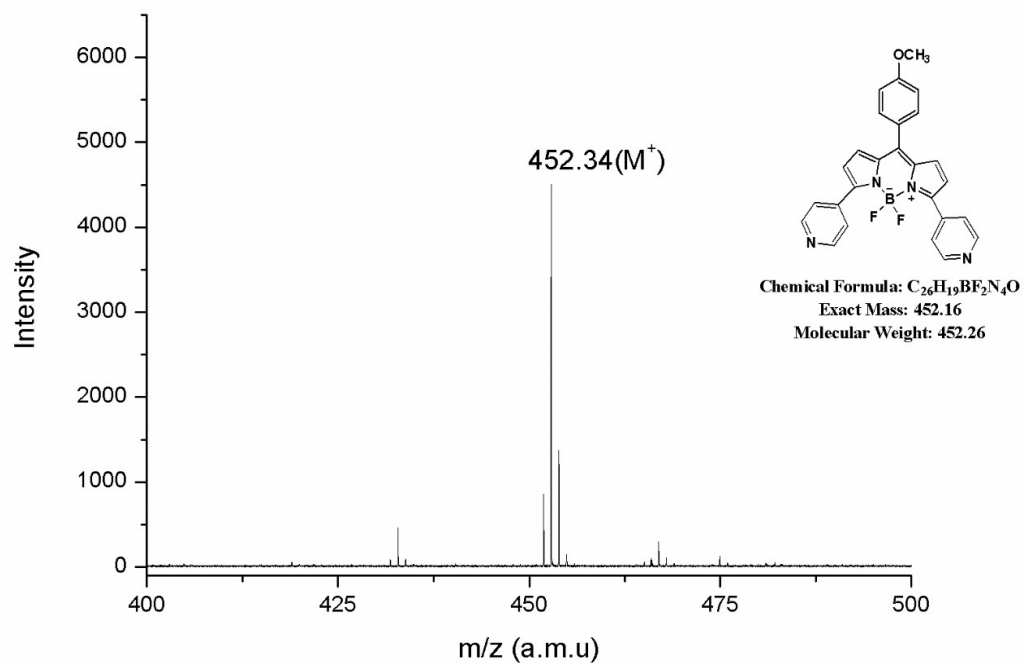

Figure SI 16: MALDI-TOF spectrum of compound 8

## FT-IR Spectra of compound

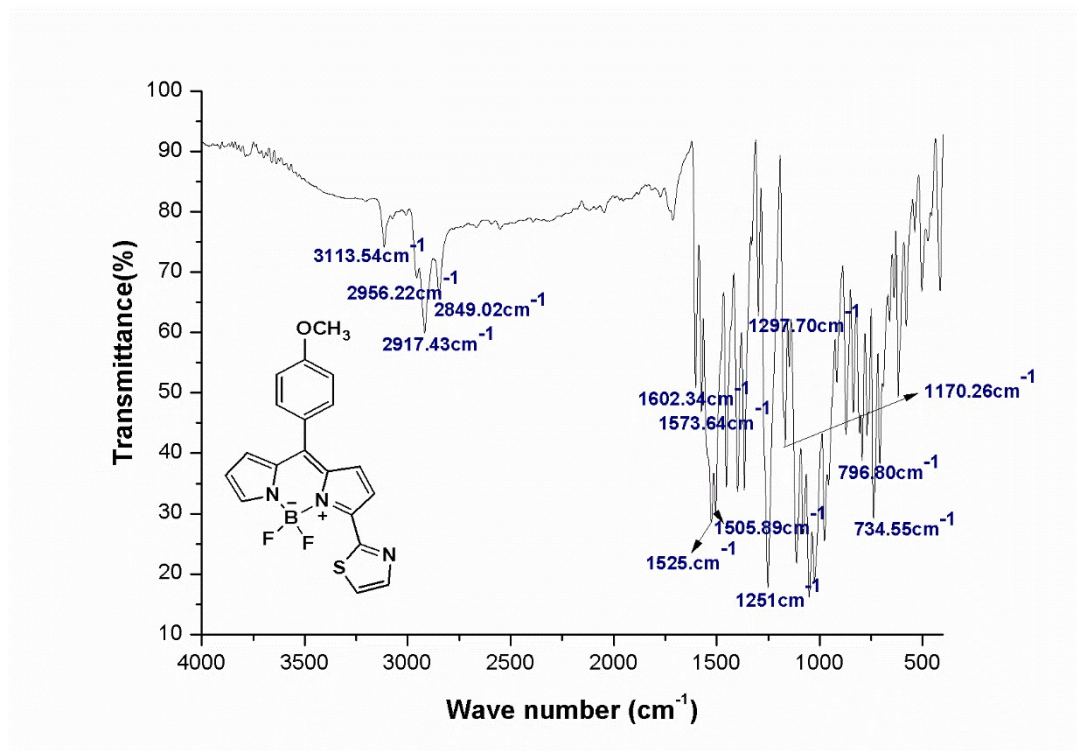

Figure SI 17: FT-IR spectrum of compound 3

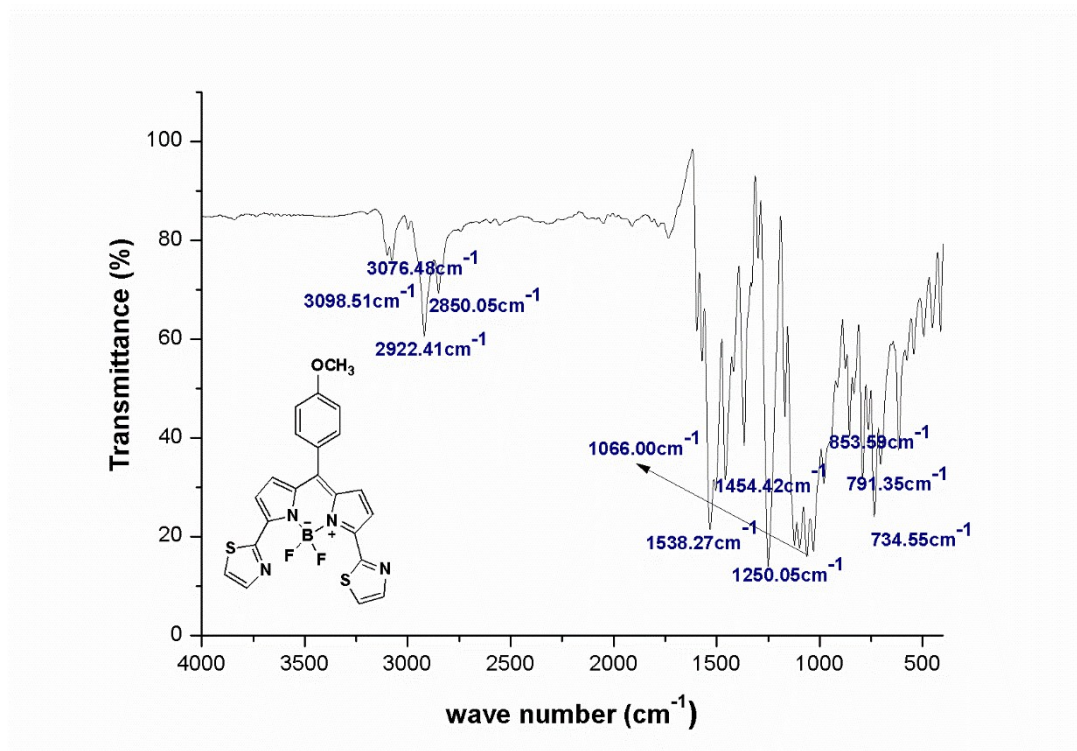

Figure SI 18: FT-IR spectrum of compound 4

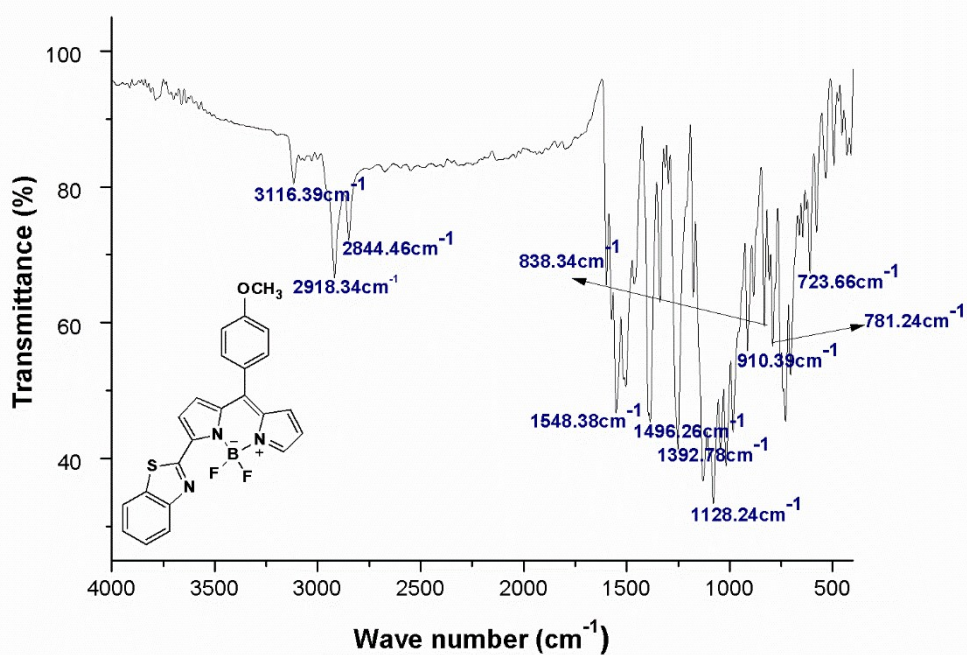

Figure SI 19: FT-IR spectrum of compound 5

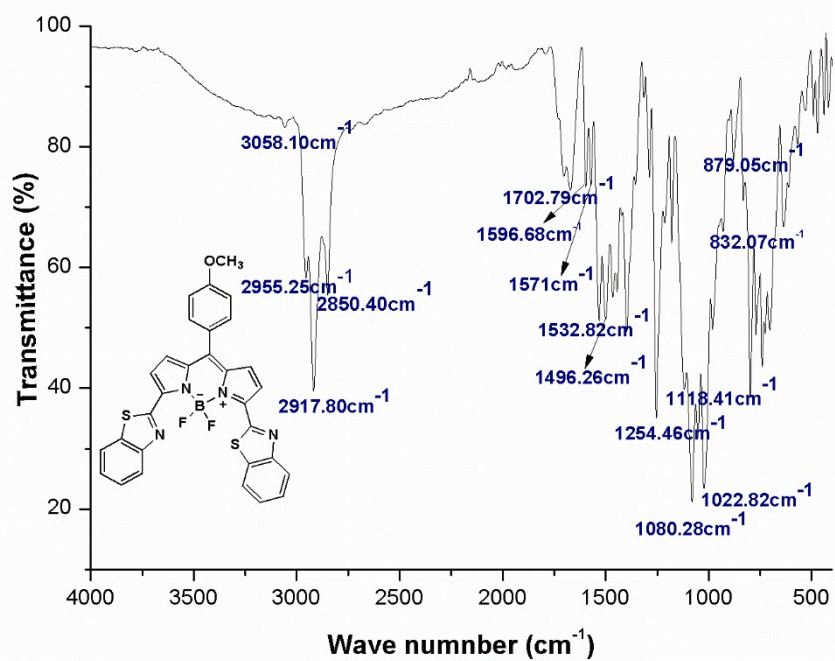

Figure SI 20: FT-IR spectrum of compound 6

## Density Functional Theory (DFT) calculations data

**Table S1.** Optimized geometries (M06-2X, Cartesian coordinates in Å) and energies of reactants and intermediates (in a.u.). Notation: E = total electronic energy, Tc = thermal correction at 298K to obtain the Gibbs free energy, Nimag = number of imaginary frequencies <S2>= expectation value.

|                                 |                                 |
|---------------------------------|---------------------------------|
| ArN <sub>2</sub> <sup>+</sup>   | Ferrocene ( FeCp <sub>2</sub> ) |
| E = -677.649637                 | E = -1650.6172541               |
| Nimag = 0                       | Nimag = 0                       |
| Tc = 0.024781                   | Tc = 0.135911                   |
| 6 -0.426157 0.188148 -0.000127  | 6 -1.743603 0.062580 1.205755   |
| 7 0.139287 1.361369 -0.000439   | 6 -1.744254 1.166041 0.312652   |
| 16 0.579080 -1.204018 -0.000109 | 6 -1.743511 0.657498 -1.012675  |
| 6 1.475265 1.183546 0.000201    | 6 -1.742322 -0.760220 -0.938612 |
| 6 1.891188 -0.132633 0.000183   | 6 -1.742432 -1.127882 0.432421  |
| 1 2.133358 2.039179 0.000626    | 1 -1.708354 0.119162 2.283007   |
| 1 2.900715 -0.516001 0.000665   | 1 -1.709191 2.208018 0.591864   |
| 7 -1.804959 0.096277 -0.000035  | 1 -1.708114 1.245469 -1.917133  |
| 7 -2.897347 0.014746 0.000318   | 1 -1.705255 -1.438634 -1.777249 |
|                                 | 1 -1.705440 -2.134962 0.818830  |
|                                 | 26 -0.000019 0.000598 0.000293  |
|                                 | 6 1.742754 -1.166169 -0.314192  |
|                                 | 6 1.742797 -0.061674 -1.206053  |
|                                 | 6 1.743329 -0.659086 1.011766   |
|                                 | 1 1.706045 -2.207717 -0.594723  |
|                                 | 6 1.743568 1.127867 -0.431363   |
|                                 | 1 1.706475 -0.116768 -2.283363  |
|                                 | 6 1.743800 0.758736 0.939224    |
|                                 | 1 1.707699 -1.248076 1.915544   |
|                                 | 1 1.707795 2.135496 -0.816532   |



|                                                                                                                                                                                                                                          |                                                                                                                                                                                                                                                                                                                                                                                                                                                                                                                                                                                                                                                                                                                              |
|------------------------------------------------------------------------------------------------------------------------------------------------------------------------------------------------------------------------------------------|------------------------------------------------------------------------------------------------------------------------------------------------------------------------------------------------------------------------------------------------------------------------------------------------------------------------------------------------------------------------------------------------------------------------------------------------------------------------------------------------------------------------------------------------------------------------------------------------------------------------------------------------------------------------------------------------------------------------------|
|                                                                                                                                                                                                                                          | 1 1.708067 1.436307 1.778614                                                                                                                                                                                                                                                                                                                                                                                                                                                                                                                                                                                                                                                                                                 |
| Ar radical<br>E = -568.3295967<br>Nimag = 0<br>Tc = 0.015199<br>⟨S2⟩ = 0.759031                                                                                                                                                          | FeCp <sub>2</sub> <sup>+•</sup><br>E = -1650.4111418<br>Nimag = 0<br>Tc = 0.135243<br>⟨S2⟩ = 0.867605                                                                                                                                                                                                                                                                                                                                                                                                                                                                                                                                                                                                                        |
| 6 -0.051901 -1.229014 -0.000058<br>7 -1.241357 -0.822950 0.000054<br>16 1.193948 -0.036772 0.000015<br>6 -1.278854 0.570351 -0.000045<br>6 -0.061965 1.167067 -0.000025<br>1 -2.231438 1.078887 0.000093<br>1 0.174098 2.219690 0.000053 | 6 1.718464 -1.062107 0.577868<br>6 1.718360 -0.878207 -0.831378<br>6 1.719161 0.519201 -1.091572<br>6 1.719840 1.198268 0.156655<br>6 1.719400 0.221057 1.187944<br>1 1.660161 -2.008698 1.093186<br>1 1.660112 -1.660527 -1.572606<br>1 1.662482 0.982447 -2.064766<br>1 1.662671 2.266948 0.296559<br>1 1.662450 0.418741 2.247587<br>26 0.000000 0.000275 -0.000008<br>6 -1.718782 0.877216 0.832218<br>6 -1.718983 1.062449 -0.576865<br>6 -1.718899 -0.520444 1.091086<br>1 -1.660967 1.658862 1.574184<br>6 -1.719308 -0.220148 -1.188147<br>1 -1.661198 2.009558 -1.091285<br>6 -1.719241 -1.198328 -0.157777<br>1 -1.661986 -0.984571 2.063849<br>1 -1.662285 -0.416791 -2.247980<br>1 -1.661513 -2.266849 -0.298697 |
| BODPy<br>E = -912.329743<br>Nimag = 0                                                                                                                                                                                                    | Ar•-BODPy<br>E = -1480.7403376<br>Nimag = 0                                                                                                                                                                                                                                                                                                                                                                                                                                                                                                                                                                                                                                                                                  |

| Tc = 0.190406 |           |           |           | Tc = 0.230487<br>(S2) = 0.765938 |           |           |           |
|---------------|-----------|-----------|-----------|----------------------------------|-----------|-----------|-----------|
| 6             | -2.053872 | -2.509280 | -0.175499 | 6                                | 1.737544  | -1.032752 | -1.007564 |
| 6             | -0.934851 | -3.354289 | -0.271214 | 6                                | 0.949903  | -2.310697 | -1.031719 |
| 6             | -0.274473 | -1.210292 | -0.061136 | 6                                | -0.455106 | -0.619637 | -0.481054 |
| 6             | 0.184623  | -2.540299 | -0.207764 | 6                                | -0.324087 | -2.060334 | -0.717549 |
| 7             | -1.662421 | -1.238593 | -0.051100 | 7                                | 0.734151  | -0.039106 | -0.629394 |
| 5             | -2.600920 | -0.003570 | 0.020464  | 5                                | 1.071679  | 1.447661  | -0.379376 |
| 9             | -3.439501 | 0.025902  | -1.088110 | 9                                | 1.902997  | 1.586815  | 0.734323  |
| 6             | -0.945035 | 3.358320  | 0.210120  | 6                                | -1.839333 | 3.717581  | 0.263611  |
| 6             | -2.061185 | 2.508548  | 0.123993  | 6                                | -0.480568 | 3.461627  | 0.025103  |
| 6             | 0.176921  | 2.546000  | 0.173516  | 6                                | -2.488643 | 2.492837  | 0.252437  |
| 6             | -0.277726 | 1.211993  | 0.051049  | 6                                | -1.502656 | 1.497472  | 0.010262  |
| 7             | -1.665754 | 1.236440  | 0.029754  | 7                                | -0.283709 | 2.138579  | -0.128544 |
| 6             | 0.425556  | 0.001584  | -0.000612 | 6                                | -1.619978 | 0.108483  | -0.144859 |
| 6             | 1.902666  | 0.002001  | 0.003435  | 6                                | -2.921150 | -0.567582 | 0.043313  |
| 6             | 2.604383  | -0.781940 | 0.925497  | 6                                | -3.450904 | -1.405366 | -0.944484 |
| 6             | 2.610304  | 0.784628  | -0.915217 | 6                                | -3.650109 | -0.363210 | 1.220155  |
| 6             | 3.993339  | -0.774721 | 0.931716  | 6                                | -4.679129 | -2.028220 | -0.755159 |
| 1             | 2.057662  | -1.372513 | 1.651033  | 1                                | -2.908866 | -1.550312 | -1.872543 |
| 6             | 3.999247  | 0.776146  | -0.913539 | 6                                | -4.878391 | -0.986015 | 1.406261  |
| 1             | 2.068504  | 1.374446  | -1.644987 | 1                                | -3.238913 | 0.273820  | 1.994899  |
| 6             | 4.692287  | 0.000539  | 0.011164  | 6                                | -5.395411 | -1.820517 | 0.419862  |
| 1             | 4.529692  | -1.372591 | 1.658197  | 1                                | -5.080374 | -2.669705 | -1.530411 |
| 1             | 4.540253  | 1.373022  | -1.637388 | 1                                | -5.427997 | -0.823564 | 2.325545  |
| 1             | 5.775445  | 0.000024  | 0.014181  | 1                                | -6.352875 | -2.306028 | 0.565514  |
| 9             | -3.360177 | -0.036679 | 1.185884  | 9                                | 1.715208  | 1.981627  | -1.497472 |
| 1             | -3.111964 | 2.760234  | 0.135191  | 1                                | 0.345207  | 4.153909  | -0.046090 |
| 1             | -0.975800 | 4.432229  | 0.296919  | 1                                | -2.278347 | 4.690947  | 0.413783  |
| 1             | 1.209569  | 2.851209  | 0.238556  | 1                                | -3.542841 | 2.303911  | 0.380733  |

|                                                                                                                                                                                                                                                                                                                                                                                                                                                                                                                                                                                  |                                                                                                                                                                                                                                                                                                                                                                                          |
|----------------------------------------------------------------------------------------------------------------------------------------------------------------------------------------------------------------------------------------------------------------------------------------------------------------------------------------------------------------------------------------------------------------------------------------------------------------------------------------------------------------------------------------------------------------------------------|------------------------------------------------------------------------------------------------------------------------------------------------------------------------------------------------------------------------------------------------------------------------------------------------------------------------------------------------------------------------------------------|
| <p>1 1.218605 -2.840752 -0.274112</p> <p>1 -0.962251 -4.425871 -0.383911</p> <p>1 -3.103889 -2.763141 -0.199578</p>                                                                                                                                                                                                                                                                                                                                                                                                                                                              | <p>1 -1.133277 -2.768868 -0.635063</p> <p>1 1.399792 -3.265635 -1.260673</p> <p>1 2.124457 -0.787424 -2.004256</p> <p>6 2.878983 -1.069472 -0.018948</p> <p>7 2.752075 -1.505341 1.195050</p> <p>16 4.447580 -0.462993 -0.416992</p> <p>6 3.930182 -1.365327 1.883601</p> <p>6 4.961330 -0.822749 1.181098</p> <p>1 3.987330 -1.686399 2.914085</p> <p>1 5.970684 -0.626688 1.505585</p> |
| <p>Ar-BODPy</p> <p>E = -1480.1656083</p> <p>Nimag = 0</p> <p>Tc = 0.220929</p>                                                                                                                                                                                                                                                                                                                                                                                                                                                                                                   | <p>BF<sub>4</sub><sup>-</sup></p> <p>E = -424.6105985</p> <p>Nimag = 0</p> <p>Tc = -0.010895</p>                                                                                                                                                                                                                                                                                         |
| <p>6 1.632786 -1.153675 0.100456</p> <p>6 0.962474 -2.393105 0.198979</p> <p>6 -0.533130 -0.724249 0.028172</p> <p>6 -0.388196 -2.125320 0.154920</p> <p>7 0.734845 -0.153781 0.005234</p> <p>5 1.002093 1.383059 0.002185</p> <p>9 1.764948 1.741005 1.106512</p> <p>6 -1.961564 3.670324 -0.029609</p> <p>6 -0.584881 3.395247 0.030215</p> <p>6 -2.612361 2.447185 -0.048222</p> <p>6 -1.615422 1.445658 0.015352</p> <p>7 -0.381317 2.074752 0.057591</p> <p>6 -1.701479 0.050162 0.008162</p> <p>6 -3.021612 -0.612137 -0.018271</p> <p>6 -3.301598 -1.573862 -0.995256</p> | <p>5 0.000000 0.000000 0.000000</p> <p>9 0.810622 0.810622 0.810622</p> <p>9 -0.810622 -0.810622 0.810622</p> <p>9 -0.810622 0.810622 -0.810622</p> <p>9 0.810622 -0.810622 -0.810622</p>                                                                                                                                                                                                |

|                                                                                                                                           |           |           |           |  |
|-------------------------------------------------------------------------------------------------------------------------------------------|-----------|-----------|-----------|--|
| 6                                                                                                                                         | -4.000840 | -0.280679 | 0.923679  |  |
| 6                                                                                                                                         | -4.546471 | -2.188320 | -1.031803 |  |
| 1                                                                                                                                         | -2.550040 | -1.815729 | -1.737586 |  |
| 6                                                                                                                                         | -5.238937 | -0.909941 | 0.890936  |  |
| 1                                                                                                                                         | -3.778822 | 0.448738  | 1.693755  |  |
| 6                                                                                                                                         | -5.514878 | -1.860353 | -0.087884 |  |
| 1                                                                                                                                         | -4.759483 | -2.921888 | -1.799630 |  |
| 1                                                                                                                                         | -5.987674 | -0.659668 | 1.632452  |  |
| 1                                                                                                                                         | -6.483326 | -2.344951 | -0.114785 |  |
| 9                                                                                                                                         | 1.654472  | 1.752307  | -1.173312 |  |
| 1                                                                                                                                         | 0.248666  | 4.082316  | 0.043941  |  |
| 1                                                                                                                                         | -2.405973 | 4.651619  | -0.063402 |  |
| 1                                                                                                                                         | -3.674362 | 2.268961  | -0.111077 |  |
| 1                                                                                                                                         | -1.199658 | -2.832893 | 0.220086  |  |
| 1                                                                                                                                         | 1.454974  | -3.346802 | 0.290088  |  |
| 6                                                                                                                                         | 3.088466  | -1.036410 | 0.118857  |  |
| 7                                                                                                                                         | 3.809278  | -2.034880 | 0.562430  |  |
| 16                                                                                                                                        | 4.024305  | 0.292641  | -0.496396 |  |
| 6                                                                                                                                         | 5.141060  | -1.772967 | 0.446460  |  |
| 6                                                                                                                                         | 5.452452  | -0.565204 | -0.103889 |  |
| 1                                                                                                                                         | 5.860965  | -2.504358 | 0.785561  |  |
| 1                                                                                                                                         | 6.425746  | -0.139478 | -0.291092 |  |
| <p> <math>\text{HBF}_4</math><br/> <math>E = -425.0057614</math><br/> <math>\text{Nimag} = 0</math><br/> <math>Tc = -0.006141</math> </p> |           |           |           |  |
| 5                                                                                                                                         | -0.492523 | 0.037064  | -0.001775 |  |
| 9                                                                                                                                         | -0.387715 | 1.348214  | -0.108970 |  |
| 9                                                                                                                                         | -0.643946 | -0.510183 | 1.186631  |  |
| 9                                                                                                                                         | -0.652205 | -0.695258 | -1.084795 |  |

|                                                                   |                                                                                                     |
|-------------------------------------------------------------------|-----------------------------------------------------------------------------------------------------|
| 9 1.712167 -0.225072 0.008165                                     |                                                                                                     |
| 1 2.207905 0.555366 -0.000395                                     |                                                                                                     |
| <b>CuCl</b><br>E = -2100.6105986<br>Nimag = 0<br>Tc = -0.022834   | CuCl radical cation<br>E = -2100.3677422<br>Nimag = 0<br>Tc = -0.023128                             |
| 29 0.000000 0.000000 0.812516                                     | 29 0.000000 0.000000 0.785272                                                                       |
| 17 0.000000 0.000000 -1.386057                                    | 17 0.000000 0.000000 -1.339581                                                                      |
| L-Ascorbic acid<br>E = -684.7212139<br>Nimag = 0<br>Tc = 0.114898 | L-Ascorbic acid radical cation<br>E = -684.4779961<br>Nimag = 0<br>Tc = 0.115528<br><S2> = 0.756504 |
| 6 -0.172174 -0.292196 0.685854                                    | 6 -0.187929 -0.237880 0.676466                                                                      |
| 6 0.662469 0.915294 0.356777                                      | 6 0.647392 0.962103 0.334720                                                                        |
| 6 1.841711 0.519496 -0.125855                                     | 6 1.886359 0.509230 -0.143784                                                                       |
| 6 1.884609 -0.949073 -0.082905                                    | 6 1.881729 -0.986153 -0.060267                                                                      |
| 8 0.707148 -1.393747 0.431129                                     | 8 0.690581 -1.350001 0.447659                                                                       |
| 1 -0.456933 -0.325792 1.742388                                    | 1 -0.462089 -0.230436 1.735911                                                                      |
| 8 2.770408 -1.688446 -0.402107                                    | 8 2.758071 -1.723963 -0.363231                                                                      |
| 8 2.908978 1.211100 -0.566759                                     | 8 2.908016 1.157222 -0.562389                                                                       |
| 8 0.263489 2.197133 0.476584                                      | 8 0.381127 2.212169 0.444193                                                                        |
| 1 2.728547 2.154403 -0.474968                                     | 1 2.786051 2.124878 -0.550318                                                                       |
| 1 -0.360619 2.298623 1.204980                                     | 1 -0.474766 2.425394 0.855381                                                                       |
| 6 -1.419262 -0.469288 -0.171655                                   | 6 -1.440663 -0.428582 -0.185873                                                                     |
| 1 -1.096055 -0.605801 -1.213057                                   | 1 -1.128552 -0.504743 -1.235797                                                                     |
| 6 -2.369040 0.718470 -0.100012                                    | 6 -2.446128 0.707555 -0.041900                                                                      |
| 1 -1.925752 1.598569 -0.573511                                    | 1 -2.058055 1.635999 -0.477757                                                                      |
| 1 -2.598465 0.939430 0.950038                                     | 1 -2.683197 0.857858 1.017582                                                                       |
| 8 -3.535492 0.296901 -0.789972                                    | 8 -3.579526 0.261247 -0.758552                                                                      |

|   |           |           |           |   |           |           |           |
|---|-----------|-----------|-----------|---|-----------|-----------|-----------|
| 1 | -4.253537 | 0.901433  | -0.587050 | 1 | -4.346210 | 0.774357  | -0.489235 |
| 8 | -2.070187 | -1.625896 | 0.306137  | 8 | -2.005378 | -1.630442 | 0.263227  |
| 1 | -2.961824 | -1.593450 | -0.062136 | 1 | -2.900864 | -1.650795 | -0.099198 |
